# Supplementary material for: A convolutional neural network for the prediction and forward design of ribozyme-based gene-control elements
Source: eLife journal article supplement (doi:10.7554/elife.59697), 2021-04-16
Supplement: supp [file elife_poa_e59697_Figure_2_figure_supplement_1.pdf › elife_poa_e59697_Figure_2_figure_supplement_1.pdf]

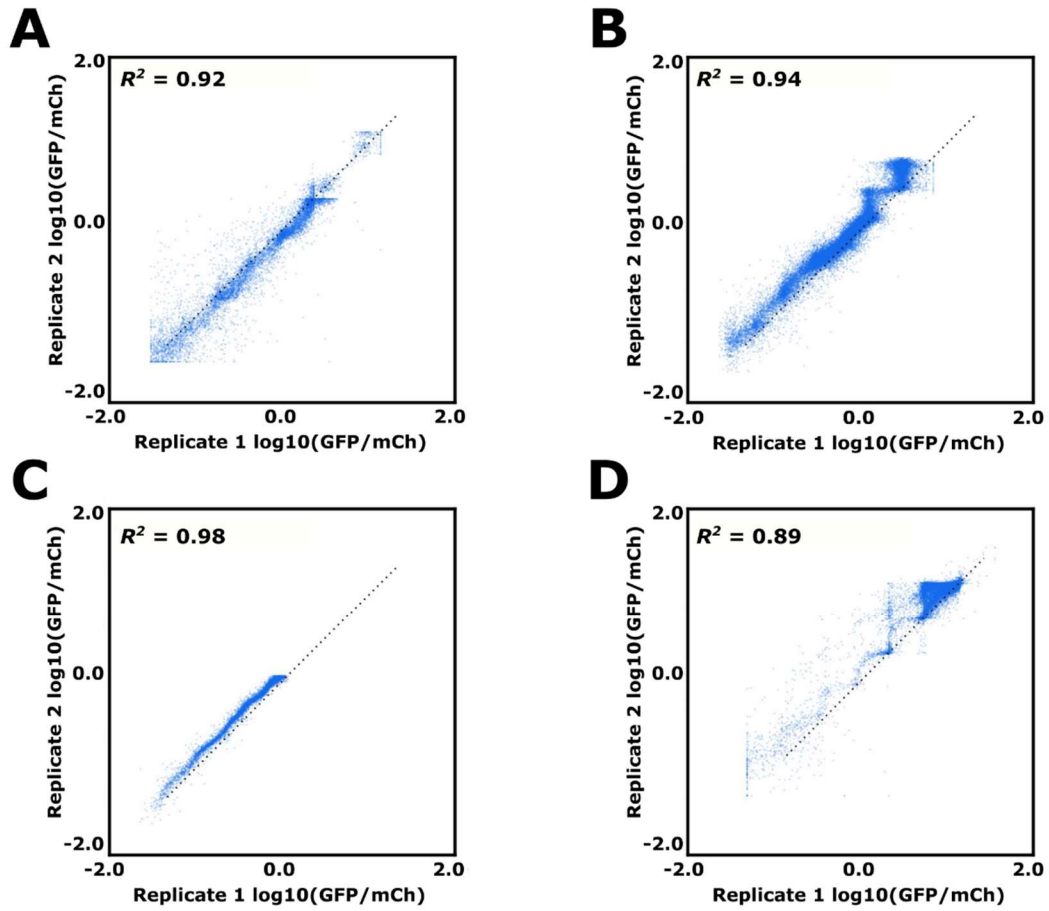

**Figure 2-figure supplement 1. Replicate data for FACS-Seq runs 1 through 4.** Each point represents a single sequence's mean estimated  $\log_{10}(\text{GFP}/\text{mCh})$ , with its x and y position determined by the  $\log_{10}(\text{GFP}/\text{mCh})$  value derived using the first and second replicate for (A) FACS-Seq 1, (B) FACS-Seq 2, and (C) FACS-Seq 3. D) Instead of two identical replicates, the x and y positions of a sequence correspond to its uninduced and induced  $\log_{10}(\text{GFP}/\text{mCh})$  value from the FACS-Seq 4 (designed) library.
