# Supplementary material for: A convolutional neural network for the prediction and forward design of ribozyme-based gene-control elements
Source: eLife journal article supplement (doi:10.7554/elife.59697), 2021-04-16
Supplement: supp [file elife_poa_e59697_Figure_3_figure_supplement_1.pdf › elife_poa_e59697_Figure_3_figure_supplement_1.pdf]

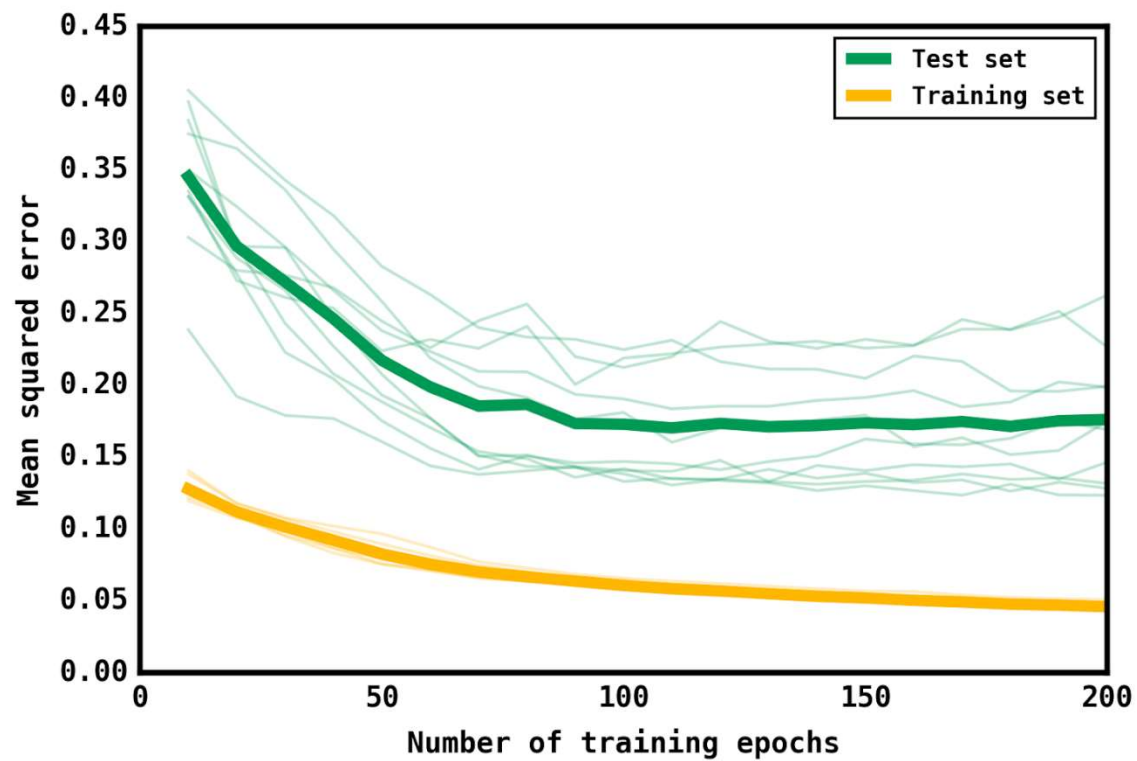

**Figure 3-figure supplement 1. Training and test loss curves for the neural network.** Loss curves as measured by the mean squared error of predictions for the training (yellow) set and the test (green) set as the number of training epochs increases. 10 iterations were performed with different test and training sets, with the thin lines representing the curves for that iteration. The thick lines represent the mean curve for the training and test sets.
