# Supplementary material for: A convolutional neural network for the prediction and forward design of ribozyme-based gene-control elements
Source: eLife journal article supplement (doi:10.7554/elife.59697), 2021-04-16
Supplement: supp [file elife_poa_e59697_Figure_3_figure_supplement_2.pdf › elife_poa_e59697_Figure_3_figure_supplement_2.pdf]

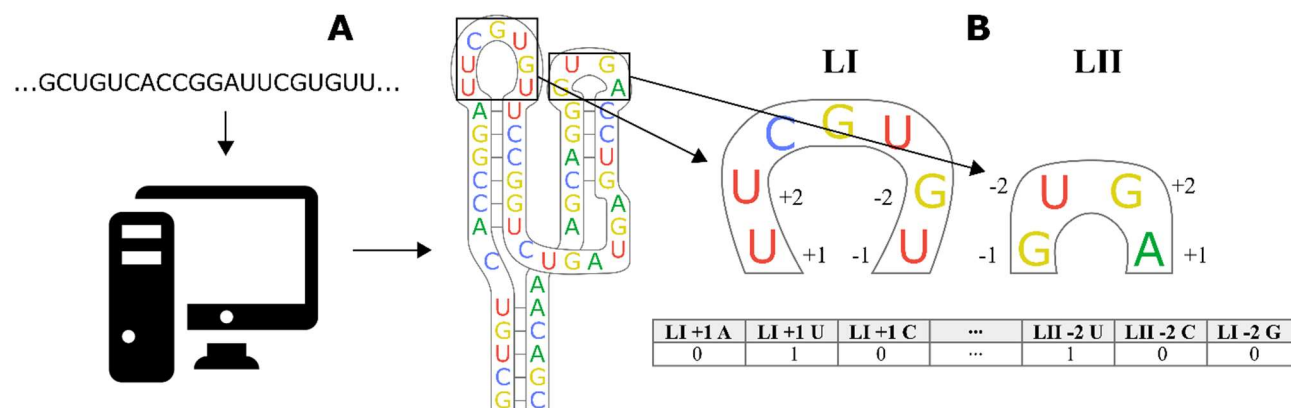

**Figure 3-figure supplement 2. Workflow for encoding of a ribozyme sequence into numerical features with a linear regression algorithm.** A) The RNA sequence is computationally-folded to obtain a predicted secondary structure. B) The predicted structure is converted into a one-dimensional set of features, where each feature is a binary recording of whether a specific base exists in a specific position close to the stem. As an example, the first nucleotide of the loop is a U, so the feature Loop1 +1 A is given a value of 0, while Loop1 +1 U is given a value of 1. The encoding of a nucleotide as a set of binary features is repeated for the two bases closest to the stem on the 5' and 3' part of the loop.
