# Supplementary material for: A convolutional neural network for the prediction and forward design of ribozyme-based gene-control elements
Source: eLife journal article supplement (doi:10.7554/elife.59697), 2021-04-16
Supplement: supp [file elife_poa_e59697_Figure_4_figure_supplement_1.pdf › elife_poa_e59697_Figure_4_figure_supplement_1.pdf]

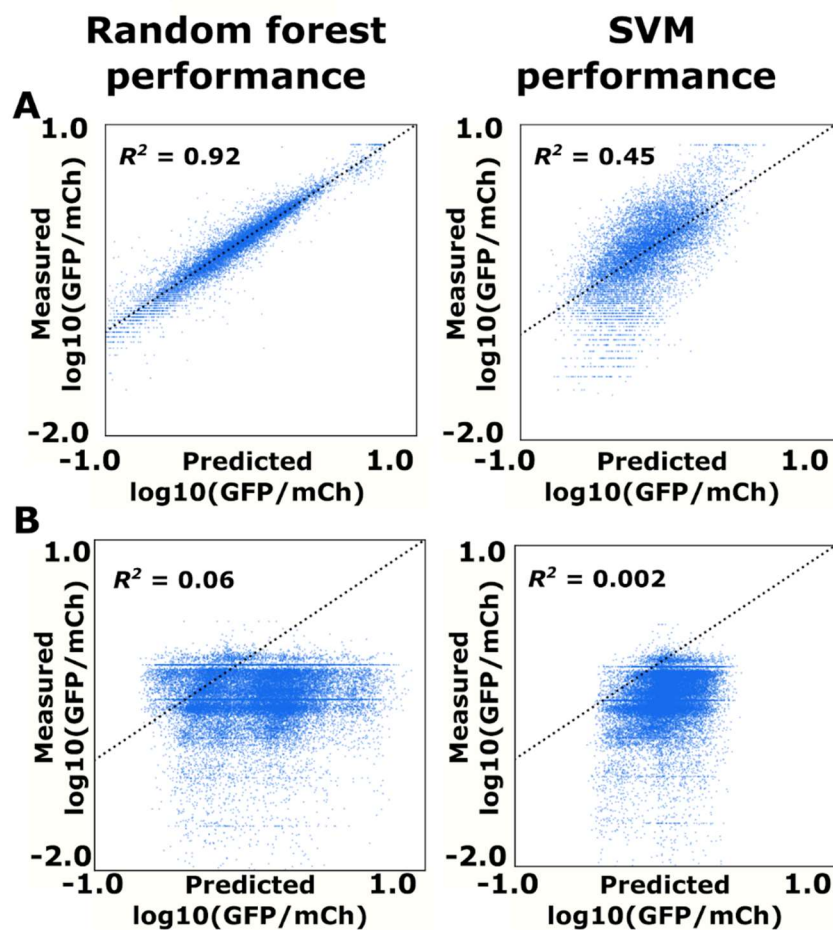

**Figure 4-figure supplement 1. Random Forest and SVM prediction of ribozyme gene-regulatory activity.** A) Comparison of the random forest and SVM algorithms on their ability to predict the basal expression of simple ribozymes. Each point on a plot represents the predicted and measured basal gene-regulatory activity for a single ribozyme sequence. The points for accurately predicted ribozymes fall close to the dotted line that represents when the predicted and measured basal gene-regulatory values are equal. B) Comparison of the random forest and SVM algorithms on their ability to predict the basal expression of ribozymes with a theophylline aptamer whose activity was measured through FACS-Seq. Each point on a plot represents the predicted and measured basal gene-regulatory activity for a single ribozyme sequence.
